# Supplementary material
Source: publisher figshare collection journal article supplement (https://gsapubs.figshare.com/ndownloader/files/39478024)
Supplement: Supplementary file 1 [file 39478024]

## Sheet: Sheet1
TABLE S2 LA-ICPMS ZIRCON U-PB ISOTOPIC ANALYSES FOR THE GRANITOID ROCKS FROM THE NORTHERN YILI BLOCK
Analysis	Content (ppm)		Th/U	Isotopic ratios						Isotopic ages(Ma)
	Th	U		207Pb/206Pb	1σ	207Pb/235U	1σ	206Pb/238U	1σ	207Pb/206Pb	1σ	207Pb/235U	1σ	206Pb/238U	1σ
C15YN07-01	153.558	233.767	0.656885	0.0549356	0.0023749	0.415877	0.0106121	0.0561809	0.000595072	409.31	96.285	353.099	7.61413	352.358	3.63701
C15YN07-02	164.289	235.237	0.698395	0.0564381	0.00107533	0.432267	0.00819628	0.0555293	0.000424107	477.82	47.2175	364.785	5.81591	348.379	2.59696
C15YN07-03	148.223	186.991	0.792675	0.0544355	0.00123377	0.420999	0.00940491	0.0563023	0.000430336	390.79	47.2175	356.765	6.72471	353.099	2.63317
C15YN07-04	111.484	197.258	0.565167	0.0544263	0.00118599	0.419252	0.00924122	0.0567588	0.00121386	387.09	48.1425	355.516	6.61592	355.884	7.40728
C15YN07-05	136.659	243.712	0.560739	0.0602176	0.00116435	0.470585	0.00904993	0.0566199	0.000405495	612.98	42.585	391.593	6.2543	355.037	2.48134
C15YN07-06	212.677	394.066	0.539698	0.0539676	0.000904222	0.419834	0.00711591	0.0563446	0.000400217	368.57	37.0325	355.932	5.09464	353.357	2.44979
C15YN07-07	184.132	264.608	0.695865	0.0535976	0.00111997	0.413563	0.00875654	0.0563945	0.000421688	353.76	80.5475	351.438	6.29449	353.661	2.58034
C15YN07-08	182.598	339.593	0.537696	0.0537206	0.000942679	0.412212	0.0076257	0.0560483	0.000392851	366.72	38.885	350.467	5.48807	351.548	2.40558
C15YN07-09	138.191	262.507	0.526427	0.0685377	0.0112859	0.438099	0.0161585	0.0559374	0.000645393	884.87	346.277	368.911	11.4116	350.871	3.94462
C15YN07-10	141.872	266.619	0.532115	0.0548604	0.00105627	0.418668	0.00940667	0.0564301	0.000412548	405.605	44.44	355.098	6.73697	353.878	2.52464
C15YN07-11	138.886	281.839	0.492786	0.0562085	0.00117836	0.423723	0.0103474	0.0560511	0.000430106	461.155	46.2925	358.71	7.38366	351.565	2.63234
C15YN07-12	117.233	232.267	0.504736	0.0572141	0.00124342	0.431061	0.0114241	0.0561297	0.000467962	498.19	48.1425	363.93	8.10952	352.045	2.86267
C15YN07-13	91.6007	158.226	0.578924	0.0598163	0.00292059	0.46324	0.0302588	0.0560729	0.000873801	598.17	105.54	386.509	20.999	351.698	5.33718
C15YN07-14	399.001	611.732	0.652248	0.0593252	0.00123874	0.450106	0.0128643	0.0567221	0.000485938	588.915	50.915	377.353	9.01143	355.66	2.97062
C15YN13-01	153.441	295.713	0.518887	0.0584114	0.0037341	0.457931	0.0295826	0.0573583	0.00160704	546.33	140.72	382.818	20.6046	359.54	9.79957
C15YN13-02	174.993	238.15	0.734802	0.0524849	0.00258555	0.399044	0.034803	0.0555702	0.00308883	305.615	112.948	340.955	25.26	348.629	18.8645
C15YN13-03	514.637	501.131	1.02695	0.0524906	0.00194243	0.425652	0.0159756	0.0561377	0.00194143	305.615	85.175	360.085	11.3808	352.094	11.8516
C15YN13-04	138.671	235.467	0.588919	0.0782583	0.00226708	0.594169	0.0165144	0.0559321	0.00056445	1153.71	57.87	473.527	10.5235	350.839	3.45114
C15YN13-05	512.363	273.8	1.87131	0.0623407	0.00368773	0.491554	0.0658711	0.0557206	0.00304705	687.05	126.68	405.969	44.8429	349.547	18.6068
C15YN19-01	153.176	247.654	0.618507	0.0533271	0.00110535	0.409623	8.11617	0.0554209	4.17789	342.65	48.1425	348.603	5.85107	347.717	2.55872
C15YN19-02	173.247	288.477	0.600556	0.0544788	0.00105556	0.428931	8.10351	0.0567684	4.37159	390.79	44.44	362.418	5.76354	355.943	2.67364
C15YN19-03	128.275	194.052	0.661036	0.0560683	0.00120589	0.440402	9.2544	0.0567789	4.31657	453.75	48.1425	370.536	6.52857	356.006	2.64014
C15YN19-04	271.06	376.481	0.719983	0.054182	0.00100088	0.421818	7.38965	0.0561113	3.70542	388.94	37.96	357.35	5.28287	351.933	2.26973
C15YN19-05	250.076	344.485	0.725941	0.0529734	0.00104378	0.404503	7.58308	0.0551058	3.9329	327.835	44.44	344.909	5.48719	345.792	2.41014
C15YN19-06	207.973	263.911	0.788041	0.0666302	0.00179584	0.525657	15.2998	0.0562475	4.17438	827.775	57.405	428.923	10.1868	352.764	2.55479
C15YN19-07	231.663	369.22	0.627441	0.0587759	0.00118576	0.461184	8.79061	0.0565189	3.93473	566.7	44.435	385.081	6.11424	354.42	2.40842
C15YN19-08	146.864	261.563	0.561486	0.0553382	0.00122977	0.43149	9.24842	0.0561882	4.62431	433.38	49.995	364.234	6.56476	352.402	2.82884
C15YN19-09	164.777	294.072	0.56033	0.0543728	0.00115797	0.424748	8.72509	0.0562522	4.1502	387.09	48.1425	359.44	6.22296	352.793	2.54006
C15YN19-10	138.838	246.394	0.563478	0.054512	0.0013182	0.423885	9.68144	0.05654	4.80118	390.79	55.55	358.825	6.90822	354.549	2.93566
C15YN19-11	265.01	318.961	0.830856	0.0540742	0.0012845	0.414802	9.19107	0.0557131	4.48283	375.98	53.6975	352.328	6.60065	349.502	2.74381
C15YN19-12	214.818	366.661	0.585876	0.0562976	0.000960612	0.436332	7.18414	0.0558861	3.77504	464.86	34.255	367.663	5.08482	350.558	2.3125
C15YN19-13	183.717	315.979	0.58142	0.0571124	0.00107268	0.440927	8.12216	0.0556947	3.91189	494.485	73.1375	370.906	5.72903	349.39	2.39616
C15YN19-14	129.433	205.725	0.629154	0.0521945	0.00120307	0.405468	9.06772	0.0562934	4.45341	294.505	53.6975	345.606	6.5552	353.044	2.72453
C15YN19-15	253.231	298.272	0.848993	0.0702782	0.0014834	0.527565	11.0905	0.0541481	4.27219	936.72	47.2225	430.193	7.37775	339.938	2.61901
C15YN19-16	177.21	215.044	0.824064	0.0533666	0.00116159	0.405355	8.53765	0.0550207	4.53067	342.65	49.995	345.525	6.17301	345.272	2.77461
C15YN19-17	161.291	290.175	0.55584	0.0520728	0.00122016	0.405367	9.492	0.0564197	5.11005	287.1	53.7	345.534	6.86203	353.815	3.12407
C15YN19-18	274.746	1722.74	0.159482	0.063021	0.000792835	0.531502	6.61488	0.0608575	4.1199	709.27	30.5525	432.806	4.39551	380.838	2.51193
C15YN19-19	175.578	326.618	0.537565	0.0543751	0.000985174	0.42655	7.91365	0.0565471	3.93514	387.09	40.7375	360.724	5.63807	354.592	2.40861
N15JH19-01	80.62	175.04	0.46058	0.05324	0.00159	0.36435	0.01033	0.04961	0.00047	339	66.21	315.5	7.68	312.1	2.92
N15JH19-02	105.02	455.67	0.230474	0.05188	0.00182	0.34828	0.01172	0.04866	0.00051	280.3	78.37	303.4	8.83	306.3	3.15
N15JH19-03	66.06	194.82	0.339082	0.05328	0.00485	0.35435	0.03141	0.04821	0.00111	340.7	193.29	308	23.55	303.5	6.81
N15JH19-04	116.22	491.45	0.236484	0.05292	0.00151	0.36556	0.00989	0.05007	0.00047	325.5	63.58	316.4	7.35	315	2.86
N15JH19-05	85.58	310.38	0.275727	0.05404	0.00154	0.369	0.00995	0.04951	0.00046	372.5	62.78	318.9	7.38	311.5	2.82
N15JH19-06	151.45	468.86	0.323018	0.05326	0.00302	0.35655	0.01962	0.04854	0.00073	339.9	122.88	309.6	14.69	305.5	4.49
N15JH19-07	284.25	832.22	0.341556	0.05346	0.00089	0.36488	0.00532	0.04949	0.00036	348.1	37.05	315.9	3.96	311.4	2.22
N15JH19-08	154.84	1438.78	0.107619	0.05262	0.00083	0.36437	0.00495	0.05022	0.00036	312.5	35.31	315.5	3.69	315.8	2.21
N15JH19-09	66.09	193.82	0.340986	0.0545	0.00177	0.36374	0.01127	0.04841	0.00048	391.6	70.61	315	8.39	304.7	2.96
N15JH19-10	189.7	543.59	0.348976	0.05519	0.0018	0.36705	0.0114	0.04823	0.00048	419.9	70.78	317.5	8.47	303.7	2.98
N15JH25-01	190.38	270.1	0.70485	0.05207	0.0014	0.35909	0.00809	0.05002	0.00071	288.7	60.42	311.5	6.05	314.6	4.35
N15JH25-02	284.36	692.55	0.410599	0.05112	0.00118	0.35274	0.00631	0.05006	0.00069	246.1	52.12	306.8	4.73	314.9	4.23
N15JH25-03	149.49	505.74	0.295587	0.05218	0.00132	0.36472	0.00758	0.0507	0.00071	293.1	56.82	315.7	5.64	318.8	4.36
N15JH25-04	150.49	999.15	0.150618	0.05208	0.00184	0.35961	0.01143	0.05008	0.00077	288.9	78.57	311.9	8.54	315	4.7
N15JH25-05	83.64	324.59	0.257679	0.05273	0.00435	0.36157	0.02876	0.04974	0.00119	317.1	176.97	313.4	21.45	312.9	7.3
N15JH25-06	168.08	354.37	0.474307	0.05154	0.00156	0.35595	0.00942	0.05009	0.00073	265	68.04	309.2	7.05	315.1	4.5
N15JH25-07	131.05	286.75	0.457018	0.05179	0.00143	0.36005	0.00846	0.05042	0.00072	276.1	61.8	312.3	6.32	317.1	4.44
N15JH25-08	157.18	530.18	0.296465	0.04971	0.0011	0.34515	0.00594	0.05036	0.00069	181.4	50.67	301.1	4.49	316.7	4.25
N15JH25-09	124.35	422.95	0.294006	0.04741	0.00119	0.32801	0.00682	0.05018	0.0007	69.1	59.13	288	5.22	315.6	4.32
N15JH25-10	75.67	195.2	0.387654	0.05695	0.00671	0.39224	0.04474	0.04995	0.00165	488.9	241.26	336	32.63	314.2	10.14
N15JH25-11	100.89	401.93	0.251014	0.05307	0.00139	0.36506	0.00806	0.04988	0.00071	331.9	58.21	316	6	313.8	4.37
N15JH25-12	107.9	369.17	0.292277	0.04489	0.00273	0.30962	0.01802	0.05002	0.00095	0.1	79.77	273.9	13.97	314.6	5.85
